# Supplementary material
Source: publisher figshare collection journal article supplement (https://acs.figshare.com/ndownloader/files/4482637)
Supplement: Supplementary file 1 [file 4482637]

# Supporting Information

## Liposomes in Double-Emulsion Globules

*Qing Wang,<sup>1</sup> Grace Tan,<sup>1</sup> Louise B. Lawson,<sup>2</sup> Vijay T. John,<sup>1</sup> Kyriakos D. Papadopoulos<sup>1\*</sup>*

<sup>1</sup> Department of Chemical & Biomolecular Engineering, Tulane University, New Orleans, Louisiana, 70118, USA

<sup>2</sup> Department of Microbiology & Immunology, Tulane University Health Sciences Center, New Orleans, Louisiana, 70112, USA

### **1. Stability of Bulk Double Emulsions with Tubular Liposomes in the W<sub>1</sub> Phase**

In the preparation of bulk double emulsions, the two-step emulsification procedure was used. In the first step, the W<sub>1</sub> aqueous phase was added to the oil phase drop-by-drop with strong magnetic stirring. Subsequently, high-shear homogenization at 1000 rpm was applied to obtain W<sub>1</sub>/O single emulsions using a homogenizer (Silverson, Massachusetts). In the second step, the W<sub>1</sub>/O single emulsions were added to the W<sub>2</sub> aqueous phase drop by drop with gentle magnetic stirring. In the double emulsions, the volume ratio of W<sub>1</sub>:O:W<sub>2</sub> is 1:1:0.5, and the compositions are shown in Table S1.

After storage of freshly prepared emulsions A and B for one hour, they were unstable –as expected – and had some phase separation. As seen in Figures S1 and S2, emulsion B shows greater stability than emulsion A, which is in agreement with the results in our capillary experiments. Following Pays et al,<sup>34</sup> this may be explained by an increase in the activation energy against the oil-film rupture after L- $\alpha$ -phosphatidylcholine adsorbs on the interface.

### **2. Stability of Tubular Liposomes Entrapped inside the Oil Phase**

According to the cryo-TEM image (Figure S3), tubular liposomes were stable for up to at least 24-hour storage when stored within the oil phase composed of 0.005 M Span 80 in *n*-hexadecane.

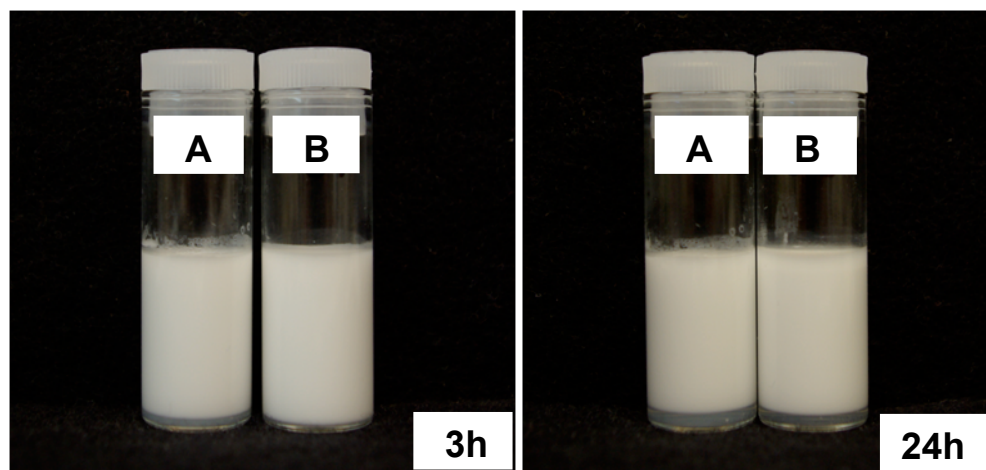

**Figure S1.** Visual comparison of emulsions A and B after 3h and 24h storage.

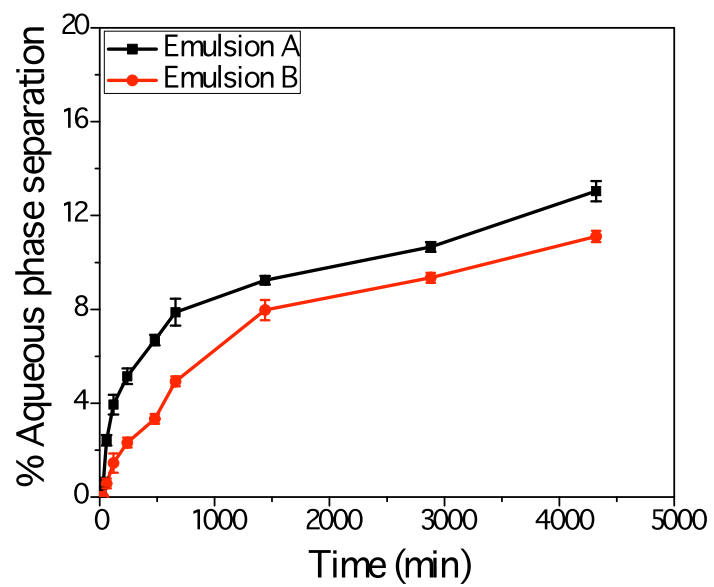

**Figure S2.** Effect of liposomes on the phase separation of emulsions A and B.

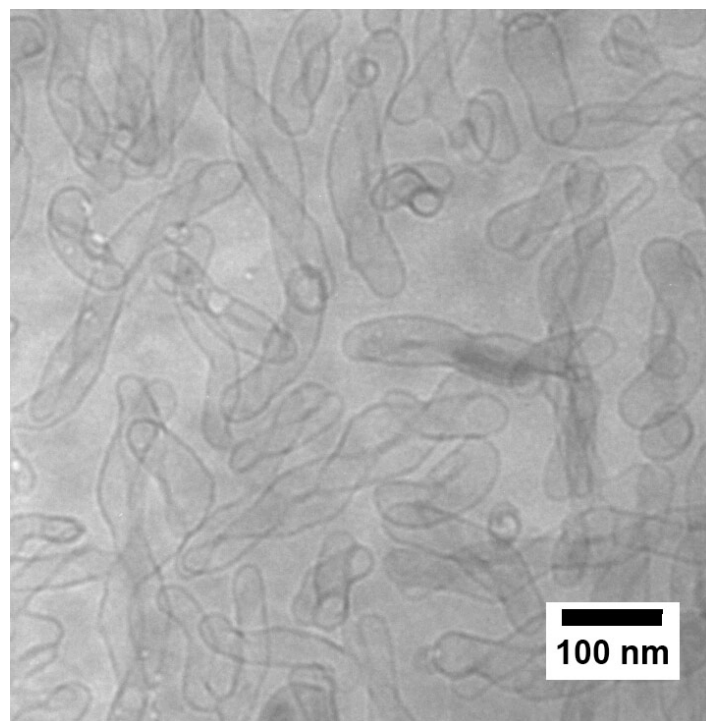

**Figure S3.** Tubular liposomes inside the oil phase for 24 hours

**Table S1.**

Compositions of double emulsions

| Double Emulsions | W <sub>1</sub>                           | O                                      | W <sub>2</sub>                         |
|------------------|------------------------------------------|----------------------------------------|----------------------------------------|
| Emulsion A       | PBS buffer solution                      | 0.03 M Span 80 in <i>n</i> -Hexadecane | 0.01 M Tween 80 in PBS buffer solution |
| Emulsion B       | Tubular liposomes in PBS buffer solution | 0.03 M Span 80 in <i>n</i> -Hexadecane | 0.01 M Tween 80 in PBS buffer solution |
